# Supplementary material for: Endophenotypes of Primary Osteoarthritis of the Hip Joint in the Bulgarian Population over 60 Years Old
Source: MDPI journal article supplement (doi:10.3390/life14050622), 2024-05-11
Supplement: s1 [file s1]

**Table S1 (former table 5).** Descriptive analyses of the 4 composite variables and their components separately for the 3 clusters

| <i>*</i>                   | <i>cluster 1 vs. cluster 2 (p<sup>†</sup>; p<sup>‡</sup>)</i> | <i>cluster 1 vs. cluster 3 (†; ‡)</i>           | <i>cluster 2 vs. cluster 3 (†; ‡)</i>          | <i>P-adj. (1; 2; 3)</i>                        |
|----------------------------|---------------------------------------------------------------|-------------------------------------------------|------------------------------------------------|------------------------------------------------|
| <b>WOMAC-scores</b> K/L-II |                                                               |                                                 |                                                | P <sup>1</sup> =0.044                          |
| K/L-III                    | p <sup>†</sup> =0.023<br>p <sup>†</sup> =0.022                | p <sup>†</sup> =0.0004 p <sup>†</sup> =0.0004   | p <sup>†</sup> =0.022<br>p <sup>†</sup> =0.021 | P <sup>2</sup> =0.001<br>P <sup>3</sup> =0.042 |
| <b>WOMAC-A</b>             |                                                               |                                                 |                                                | P <sup>1</sup> =0.027                          |
| K/L-II                     | p <sup>†</sup> =0.017                                         | p <sup>†</sup> =0.0002 p <sup>†</sup> =0.0001   | p <sup>†</sup> =0.016                          | P <sup>2</sup> =0.003                          |
| K/L-III                    | p <sup>†</sup> =0.016                                         |                                                 | p <sup>†</sup> =0.015                          | P <sup>3</sup> =0.025                          |
| <b>WOMAC-C –values</b>     |                                                               |                                                 |                                                | P <sup>1</sup> =0.029                          |
| K/L-II                     | p <sup>†</sup> =0.019                                         | p <sup>†</sup> =0.0003 p <sup>†</sup> =0.0002   | p <sup>†</sup> =0.019                          | P <sup>2</sup> =0.004                          |
| K/L-III                    | p <sup>†</sup> =0.018                                         |                                                 | p <sup>†</sup> =0.018                          | P <sup>3</sup> =0.027                          |
| <b>Biomarkers scores</b>   |                                                               |                                                 |                                                | P <sup>1</sup> =0.044                          |
| K/L-II                     | p <sup>†</sup> =0.023                                         | p <sup>†</sup> =0.0004 p <sup>†</sup> =0.0003   | p <sup>†</sup> =0.022                          | P <sup>2</sup> =0.001                          |
| K/L-III                    | p <sup>†</sup> =0.022                                         |                                                 | p <sup>†</sup> =0.021                          | P <sup>3</sup> =0.043                          |
| <b>25-OH-D –values</b>     |                                                               |                                                 |                                                | P <sup>1</sup> =0.021                          |
| K/L-II                     | p <sup>†</sup> =0.007                                         | p <sup>†</sup> =0.00002 p <sup>†</sup> =0.00001 | p <sup>†</sup> =0.006                          | P <sup>2</sup> =0.002                          |
| K/L-III                    | p <sup>†</sup> =0.006                                         |                                                 | p <sup>†</sup> =0.005                          | P <sup>3</sup> =0.017                          |
| <b>s-CTX-I –values</b>     |                                                               |                                                 |                                                | P <sup>1</sup> =0.027                          |
| K/L-II                     | p <sup>†</sup> =0.022                                         | p <sup>†</sup> =0.003                           | p <sup>†</sup> =0.017                          | P <sup>2</sup> =0.005                          |
| K/L-III                    | p <sup>†</sup> =0.021                                         | p <sup>†</sup> =0.002                           | p <sup>†</sup> =0.015                          | P <sup>3</sup> =0.025                          |
| <b>u-CTX-II –values</b>    |                                                               |                                                 |                                                | P <sup>1</sup> =0.028                          |
| K/L-II                     | p <sup>†</sup> =0.024                                         | p <sup>†</sup> =0.0004 p <sup>†</sup> =0.0003   | p <sup>†</sup> =0.019                          | P <sup>2</sup> =0.007                          |
| K/L-III                    | p <sup>†</sup> =0.022                                         |                                                 | p <sup>†</sup> =0.017                          | P <sup>3</sup> =0.025                          |
| <b>BMD-scores</b>          |                                                               |                                                 |                                                | P <sup>1</sup> =0.043                          |
| K/L-II                     | p <sup>†</sup> =0.023                                         | p <sup>†</sup> =0.0004 p <sup>†</sup> =0.0004   | p <sup>†</sup> =0.022                          | P <sup>2</sup> =0.008                          |
| K/L-III                    | p <sup>†</sup> =0.021                                         |                                                 | p <sup>†</sup> =0.021                          | P <sup>3</sup> =0.042                          |
| <b>TB-BMD</b>              |                                                               |                                                 |                                                | P <sup>1</sup> =0.026                          |
| K/L-II                     | p <sup>†</sup> =0.019                                         | p <sup>†</sup> =0.0002 p <sup>†</sup> =0.0001   | p <sup>†</sup> =0.016                          | P <sup>2</sup> =0.003                          |
| K/L-III                    | p <sup>†</sup> =0.017                                         |                                                 | p <sup>†</sup> =0.015                          | P <sup>3</sup> =0.025                          |
| <b>LS-BMD</b>              |                                                               |                                                 |                                                | P <sup>1</sup> =0.027                          |
| K/L-II                     | p <sup>†</sup> =0.016                                         | p <sup>†</sup> =0.0002 p <sup>†</sup> =0.0001   | p <sup>†</sup> =0.016                          | P <sup>2</sup> =0.002                          |
| K/L-III                    | p <sup>†</sup> =0.015                                         |                                                 | p <sup>†</sup> =0.015                          | P <sup>3</sup> =0.025                          |
| <b>PF-BMD</b>              |                                                               |                                                 |                                                | P <sup>1</sup> =0.029                          |
| K/L-II                     | p <sup>†</sup> =0.021                                         | p <sup>†</sup> =0.0004 p <sup>†</sup> =0.0003   | p <sup>†</sup> =0.019                          | P <sup>2</sup> =0.004                          |
| K/L-III                    | p <sup>†</sup> =0.019                                         |                                                 | p <sup>†</sup> =0.018                          | P <sup>3</sup> =0.027                          |
| <b>mJSW</b>                |                                                               |                                                 |                                                | P <sup>1</sup> =0.033                          |
| K/L-II                     | p <sup>†</sup> =0.017                                         | p <sup>†</sup> =0.0003 p <sup>†</sup> =0.0004   | p <sup>†</sup> =0.015                          | P <sup>2</sup> =0.005                          |
| K/L-III                    | p <sup>†</sup> =0.018                                         |                                                 | p <sup>†</sup> =0.016                          | P <sup>3</sup> =0.034                          |

WOMAC score: WOMAC-A + WOMAC-C; Biomarker scores: levels of s-CTX-I + levels of u-CTX-II; BMD score: LS-BMD + PF-BMD + TB-BMD; \*: indicates the use of the Kruskal-Wallis test; †: indicates the p-values of comparisons in the K/L-II grade; ‡: indicates the p-values of comparisons in the K/L-III grade; p adj.: adjusted p-values using the Holm-Bonferroni post hoc correction to limit the bias associated with multiple statistical tests; P<sup>1</sup>: indicates p-values of the comparisons between cluster-1 and cluster-2; P<sup>2</sup>: indicates the p-values of the comparisons between cluster-1 and cluster-3; P<sup>3</sup>: indicates p-values of the comparisons between cluster-2 and cluster-3.

**Table S2 (former table 8).** Descriptive analyses of the four composite variables and their components separately for the M36 clusters

| *                        | cluster 1 vs. cluster 2 <sup>‡</sup> (p <sup>†</sup> ; p <sup>‡</sup> ) | cluster 1 vs. cluster 3 (†; ‡) | cluster 2* vs. cluster 3 (†; ‡) | P-adj. (†; ‡; ‡)      |
|--------------------------|-------------------------------------------------------------------------|--------------------------------|---------------------------------|-----------------------|
| <b>WOMAC-scores</b>      |                                                                         |                                |                                 | P <sup>1</sup> =0.044 |
| K/L-II                   | p <sup>†</sup> =0.023                                                   | p <sup>†</sup> =0.0004         | p <sup>†</sup> =0.023           | P <sup>2</sup> =0.001 |
| K/L-III                  | p <sup>†</sup> =0.022                                                   | p <sup>†</sup> =0.0004         | p <sup>†</sup> =0.022           | P <sup>3</sup> =0.044 |
| <b>WOMAC-A –values</b>   |                                                                         |                                |                                 | P <sup>1</sup> =0.033 |
| K/L-II                   | p <sup>†</sup> =0.022                                                   | p <sup>†</sup> =0.0002         | p <sup>†</sup> =0.017           | P <sup>2</sup> =0.003 |
| K/L-III                  | p <sup>†</sup> =0.021                                                   | p <sup>†</sup> =0.0001         | p <sup>†</sup> =0.016           | P <sup>3</sup> =0.033 |
| <b>WOMAC-C –values</b>   |                                                                         |                                |                                 | P <sup>1</sup> =0.033 |
| K/L-II                   | p <sup>†</sup> =0.019                                                   | p <sup>†</sup> =0.0003         | p <sup>†</sup> =0.019           | P <sup>2</sup> =0.004 |
| K/L-III                  | p <sup>†</sup> =0.018                                                   | p <sup>†</sup> =0.0002         | p <sup>†</sup> =0.018           | P <sup>3</sup> =0.033 |
| <b>Biomarkers scores</b> |                                                                         |                                |                                 | P <sup>1</sup> =0.044 |
| K/L-II                   | p <sup>†</sup> =0.024                                                   | p <sup>†</sup> =0.0004         | p <sup>†</sup> =0.023           | P <sup>2</sup> =0.001 |
| K/L-III                  | p <sup>†</sup> =0.022                                                   | p <sup>†</sup> =0.0003         | p <sup>†</sup> =0.022           | P <sup>3</sup> =0.043 |
| <b>s-CTX-I –values</b>   |                                                                         |                                |                                 | P <sup>1</sup> =0.032 |
| K/L-II                   | p <sup>†</sup> =0.022                                                   | p <sup>†</sup> =0.003          | p <sup>†</sup> =0.023           | P <sup>2</sup> =0.005 |
| K/L-III                  | p <sup>†</sup> =0.021                                                   | p <sup>†</sup> =0.002          | p <sup>†</sup> =0.021           | P <sup>3</sup> =0.031 |
| <b>u-CTX-II –values</b>  |                                                                         |                                |                                 | P <sup>1</sup> =0.028 |
| K/L-II                   | p <sup>†</sup> =0.023                                                   | p <sup>†</sup> =0.0004         | p <sup>†</sup> =0.024           | P <sup>2</sup> =0.007 |
| K/L-III                  | p <sup>†</sup> =0.022                                                   | p <sup>†</sup> =0.0003         | p <sup>†</sup> =0.022           | P <sup>3</sup> =0.029 |
| <b>BMD-scores</b>        |                                                                         |                                |                                 | P <sup>1</sup> =0.043 |
| K/L-II                   | p <sup>†</sup> =0.023                                                   | p <sup>†</sup> =0.0004         | p <sup>†</sup> =0.024           | P <sup>2</sup> =0.008 |
| K/L-III                  | p <sup>†</sup> =0.021                                                   | p <sup>†</sup> =0.0004         | p <sup>†</sup> =0.022           | P <sup>3</sup> =0.042 |
| <b>TB-BMD</b>            |                                                                         |                                |                                 | P <sup>1</sup> =0.026 |
| K/L-II                   | p <sup>†</sup> =0.019                                                   | p <sup>†</sup> =0.0002         | p <sup>†</sup> =0.019           | P <sup>2</sup> =0.003 |
| K/L-III                  | p <sup>†</sup> =0.017                                                   | p <sup>†</sup> =0.0001         | p <sup>†</sup> =0.017           | P <sup>3</sup> =0.025 |
| <b>LS-BMD</b>            |                                                                         |                                |                                 | P <sup>1</sup> =0.027 |
| K/L-II                   | p <sup>†</sup> =0.016                                                   | p <sup>†</sup> =0.0002         | p <sup>†</sup> =0.016           | P <sup>2</sup> =0.002 |
| K/L-III                  | p <sup>†</sup> =0.015                                                   | p <sup>†</sup> =0.0001         | p <sup>†</sup> =0.015           | P <sup>3</sup> =0.026 |
| <b>PF-BMD</b>            |                                                                         |                                |                                 | P <sup>1</sup> =0.029 |
| K/L-II                   | p <sup>†</sup> =0.021                                                   | p <sup>†</sup> =0.0004         | p <sup>†</sup> =0.021           | P <sup>2</sup> =0.004 |
| K/L-III                  | p <sup>†</sup> =0.019                                                   | p <sup>†</sup> =0.0003         | p <sup>†</sup> =0.019           | P <sup>3</sup> =0.027 |
| <b>mJSN</b>              |                                                                         |                                |                                 | P <sup>1</sup> =0.043 |
| K/L-II                   | p <sup>†</sup> =0.017                                                   | p <sup>†</sup> =0.0003         | p <sup>†</sup> =0.017           | P <sup>2</sup> =0.005 |
| K/L-III                  | p <sup>†</sup> =0.018                                                   | p <sup>†</sup> =0.0004         | p <sup>†</sup> =0.018           | P <sup>3</sup> =0.044 |

WOMAC-score: WOMAC-A + WOMAC-C; Biomarker score: levels of s-CTX-I + levels of u-CTX-II; BMD-score: LS-BMD + PF-BMD + TB-BMD; \*: indicates that the Kruskal–Wallis test was applied; †: indicates p-values of the comparisons in the K/L-II grade; ‡: indicates p-values of the comparisons in the K/L-III grade; P-adj.: adjusted p-values using the Holm-Bonferroni post hoc correction to limit the bias associated with multiple statistical tests); P<sup>1</sup>: p-values of the comparisons between cluster 1 and cluster 2<sup>‡</sup>; P<sup>2</sup>: p-values of the comparisons between cluster 1 and cluster 3; P<sup>3</sup>: p-values of the comparisons between cluster 2\* and cluster 3.

**Table S3.** Descriptive analyses and comparisons of analgesia with Diclofenac sodium 2x75mg/24h vs. Tramadol hydrochloride 2x100mg/24h

| *            | p-values <sup>†</sup><br>Cluster 1 | p-values <sup>†</sup> Cluster<br>2 <sup>#</sup> | p-values <sup>†</sup> Cluster<br>2* | p-values <sup>†</sup> Cluster<br>3 | P-adj. (1; 2; 3; 4; 5)                                                                                                         |
|--------------|------------------------------------|-------------------------------------------------|-------------------------------------|------------------------------------|--------------------------------------------------------------------------------------------------------------------------------|
| WOMAC-scores | p <sup>†</sup> = 0.079             | p <sup>†</sup> = 0.059                          | p <sup>†</sup> = 0.021              | p <sup>†</sup> = 0.0001            | P <sup>1</sup> = 0.045<br>P <sup>2</sup> = 0.023<br>P <sup>3</sup> = 0.001<br>P <sup>4</sup> = 0.026<br>P <sup>5</sup> = 0.042 |

WOMAC score: WOMAC-A + WOMAC-C; \*: indicates that the Kruskal–Wallis test was applied; †: indicates p - values of the comparisons Diclofenac sodium 2x75mg/24h vs. Tramadol hydrochloride 2x100mg/24h; P-adj.: adjusted p-values using the Holm-Bonferroni post hoc correction to limit the bias associated with multiple statistical tests); P<sup>1</sup>: p-values of the comparisons of p<sup>†</sup>, between cluster 1 and cluster 2<sup>#</sup>; P<sup>2</sup>: p-values of the comparisons of p<sup>†</sup>, between cluster 1 and cluster 2\*; P<sup>3</sup>: p-values of the comparisons of p<sup>†</sup>, between cluster 1 and 3; P<sup>4</sup>: p-values of the comparisons of p<sup>†</sup>, between cluster 2<sup>#</sup> and 2\*; P<sup>5</sup>: p-values of the comparisons of p<sup>†</sup>, between cluster 2\* and 3.
